# Supplementary material
Source: Springer Nature journal article supplement (https://www.springermedizin.de/resource/supplementary/12881_2009_595_MOESM1_ESM.pdf/9451024)

**EGFR 2183A>G in exon 18**

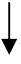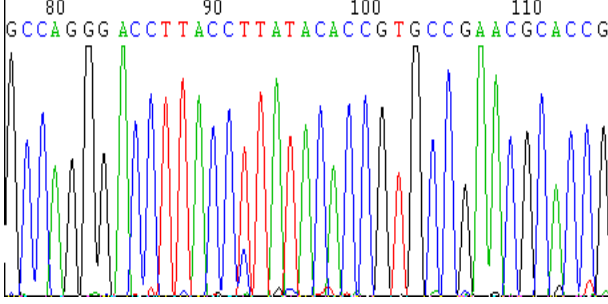

**Reverse sequences**

**EGFR 2546A>T in exon 21**

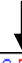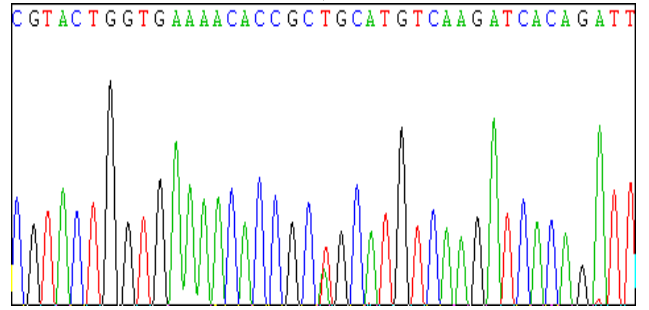

**EGFR 2611G>A in exon 21**

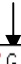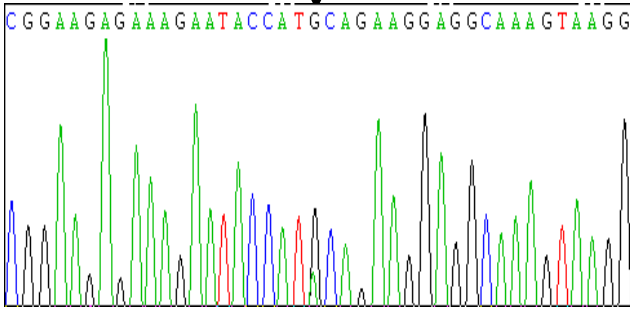

**K-ras 133G>A in codon 45**

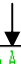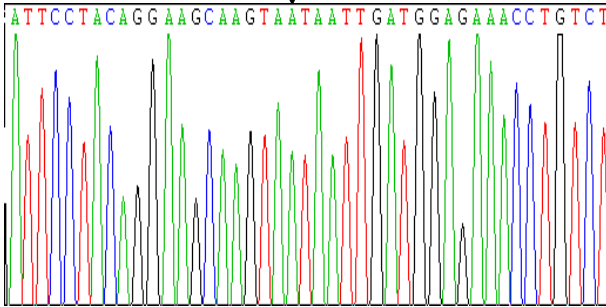

**K-ras 205G>A in codon 69**

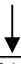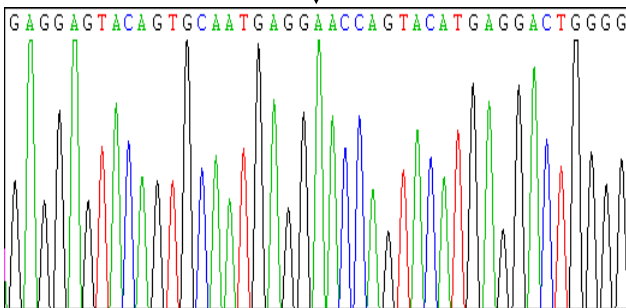

**KRAS 239G>A in codon 80**

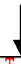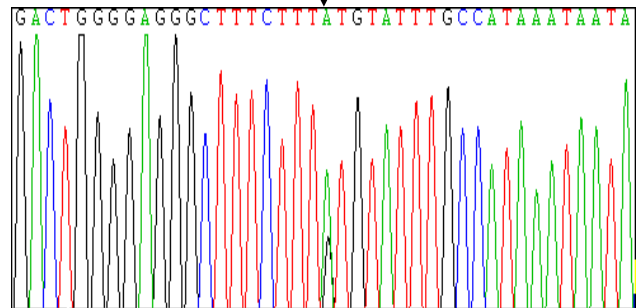

Supplement: MOESM1 [file 9451024]
